# Supplementary material for: APOE Genotype Differentially Modulates Effects of Anti-Aβ, Passive Immunization in APP Transgenic Mice
Source: Springer Nature journal article supplement (doi:10.1186/s13024-017-0156-1), 2017-01-31

**Figure S1**

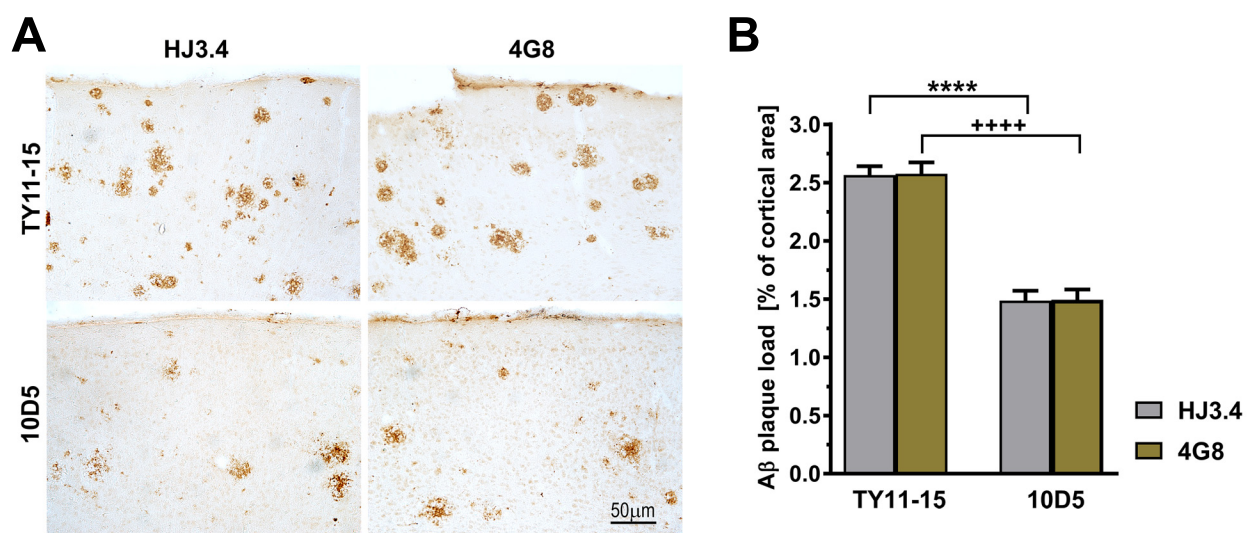

Supplement: MOESM1 [file 12030120]
